# Supplementary material
Source: PubMed Central journal article supplement (PMC2825417)
Supplement: supp_M109.018770_jbc.M109.018770-1.pdf [file supp_M109.018770_jbc.M109.018770-1.pdf]

## Supplementary Table 1S

### Sequences of the used primers

| Primer no | Primer sequence                                      | Description         |
|-----------|------------------------------------------------------|---------------------|
| 1         | F 5'-TATCCCGGGTATGTCCAAGGCCAGGGTCTA-3'               | ZmCK2 $\alpha$ -1   |
| 2         | R 5'-AATGTCGACTCACGCTCGCGTCCTGCTGTT-3'               | ZmCK2 $\alpha$ -1   |
| 3         | F 5'-ATAGAATTCATGTCTGGACTCGGAGGAG-3'                 | ZmeIF5A             |
| 4         | F 5'-ATAGAATTCATGGCGGACTCGGAGGAG-3'                  | ZmeIF5ASer2Ala      |
| 5         | F 5'-ATAGAATTCATGTCTGGACGCGGAGGAG-3'                 | ZmeIF5ASer4Ala      |
| 6         | F 5'-ATAGGATCCGACTCGGAGGAGCACCAC-3'                  | $\Delta$ MetZmeIF5A |
| 7         | R 5'-ATTGTCGACTTACTTGGGGCCAACATC-3'                  | ZmeIF5A             |
| 8         | F 5'-ATAGAATTCATGGATGACTCGGAGGAG-3'                  | ZmeIF5ASer2Asp      |
| 9         | R 5'-TATAAGCTTGGGGCAACATCCTTCAG-3'                   | ZmeIF5A             |
| 10        | F 5'-AAGCTTGGAGGTGGAGGTGGAGCTGTGAGCAAGGGCGAGGAG-3'   | EYFP                |
| 11        | R 5'-CTCGAGTACTTGTACAGCTCGTCCATGCCGAGAGTGATCCCGGC-3' | EYFP                |
| 12        | F 5'-TTAGAATTCATGTCTGACGAAGAACACACC-3'               | SceIF5A             |
| 13        | F 5'-TTAGAATTCATGGCTGACGAAGAACACACC-3'               | SceIF5ASer2Ala      |
| 14        | R 5'-ATTCTCGAGCTAATCAGATCTTGGAGCTTC-3'               | SceIF5A             |
| 15        | F 5'-TTAGAATTCATGTCTGACGACGAGCACCAC-3'               | AteIF5A             |
| 16        | F 5'-TTAGAATTCATGGCTGACGACGAGCACCAC-3'               | AteIF5ASer2Ala      |
| 17        | R 5'-ATTCTCGAGTACTTGCCACCACCAACTTC-3'                | AteIF5A             |

F - forward primers contained START codon. R - reverse primers contained STOP codon.

Restriction sites were present as follow: in primer 1 for SmaI; in primers 2 and 7 for SalI; in primers 3, 4, 5, 8, 12, 13, 15 and 16 for EcoRI; in primer 6 for BamHI; in primers 9 and 10 for HindIII; in primers 11, 14 and 17 for XhoI. Additionally primer 11 contained linker (Gln)<sub>5</sub>Ala.
