# Supplementary material
Source: PubMed Central journal article supplement (PMC2825417)
Supplement: supp_M109.018770_jbc.M109.018770-2.pdf [file supp_M109.018770_jbc.M109.018770-2.pdf]

Supplementary Table 2S

Constructs used for transient expression in maize protoplasts

| No | Construct                | N-terminus of eIF5A | Description                                                     |
|----|--------------------------|---------------------|-----------------------------------------------------------------|
| 1  | EYFP-pLNU                | none                | control                                                         |
| 2  | ZmeIF5Awt-EYFP-pLNU      | <b>MSDSEEHH</b>     | wild type protein                                               |
| 3  | ZmeIF5ASer2Ala-EYFP-pLNU | <b>MADSEEHH</b>     | protein with Ser2 mutated to Ala which cannot be phosphorylated |
| 4  | ZmeIF5ASer2Asp-EYFP-pLNU | <b>MDDSEEHH</b>     | protein with Ser2 mutated to Asp which mimics phosphorylation   |

Ser2 in wild ZmeIF5A and its mutation for Ala or Asp are bolded.
