# Supplementary material
Source: PubMed Central journal article supplement (PMC2825417)

Figure 1S. Phosphorylation of recombinant ZmeIF5A variants by CK2.

A. *ZmeIF5A* cDNA was cloned into pGEX-4T-1 expression vector using BamHI/SalI (rows 1 and 3; primers 6 and 7) and EcoRI/SalI restriction sites (row 2; primers 3 and 7). The obtained recombinant proteins were not cleaved (row 1) or cleaved with thrombin (rows 2 and 3). The resulted three recombinant *ZmeIF5A* variants have the CK2-phosphorylatable serine residue at different positions: 226 (row 1), 7 (row 2) or 2 (row 3). The amino acid sequences of obtained proteins are bolded and the phosphorylatable serine is marked with P. The consensus sequence for CK2 is shadowed.

B. Autoradiography of phosphorylated *ZmeIF5A* variants (lanes 1-3) corresponding to the constructs described in panel A, rows 1-3. As negative and positive controls of CK2 phosphorylation, GST (lane 4) and casein (lane 5) were used, respectively.

**A**

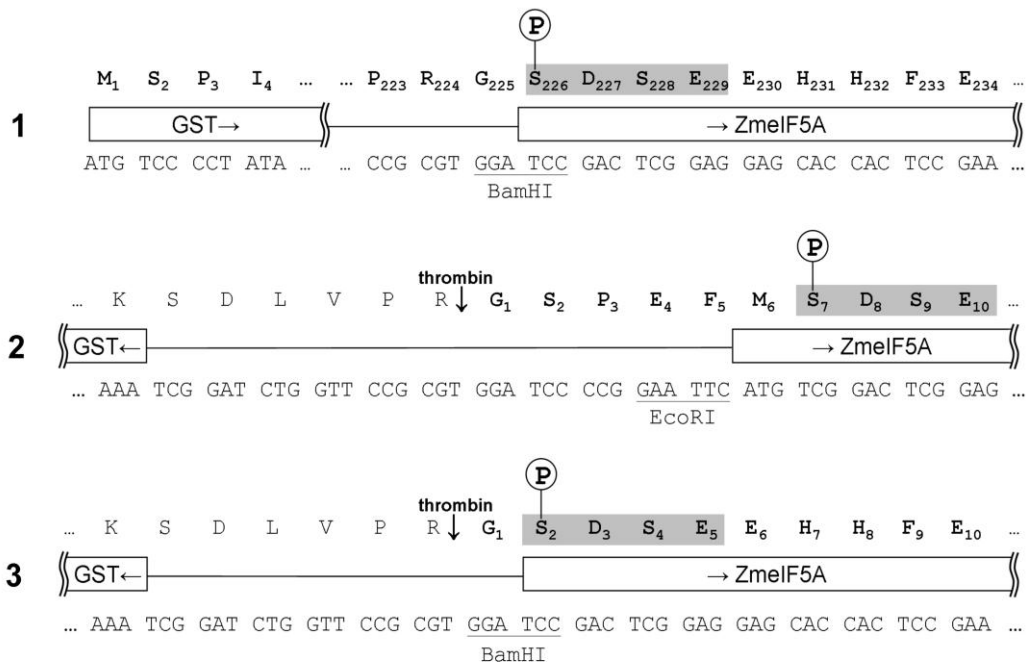

**B**

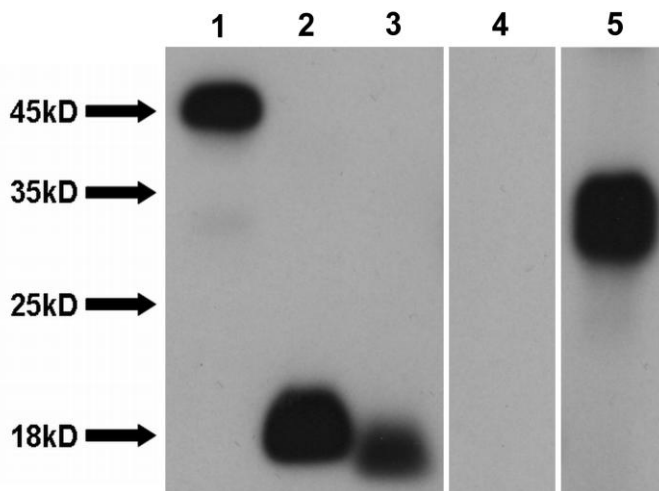

Supplement: supp_M109.018770_jbc.M109.018770-3.pdf [file supp_M109.018770_jbc.M109.018770-3.pdf]
