# Supplementary material
Source: PubMed Central journal article supplement (PMC2825417)

Figure 2S. pLNU vector used for transient expression.

A. Map of pLNU vector with *ZmeIF5A-EYFP* sequence used for transformation of maize protoplasts. *ZmeIF5A-EYFP* was cloned into EcoRI – Sall/XhoI sites located between maize *Ubi-1* promoter with *Ubi-1* first intron and NOS terminator sequence. B. The 5'-terminal sequence of *ZmeIF5A-EYFP* in pLNU vector. Part of *Ubi-1* intron sequence with PstI restriction site containing 3'-splice junction and the first ATG codon are bolded.

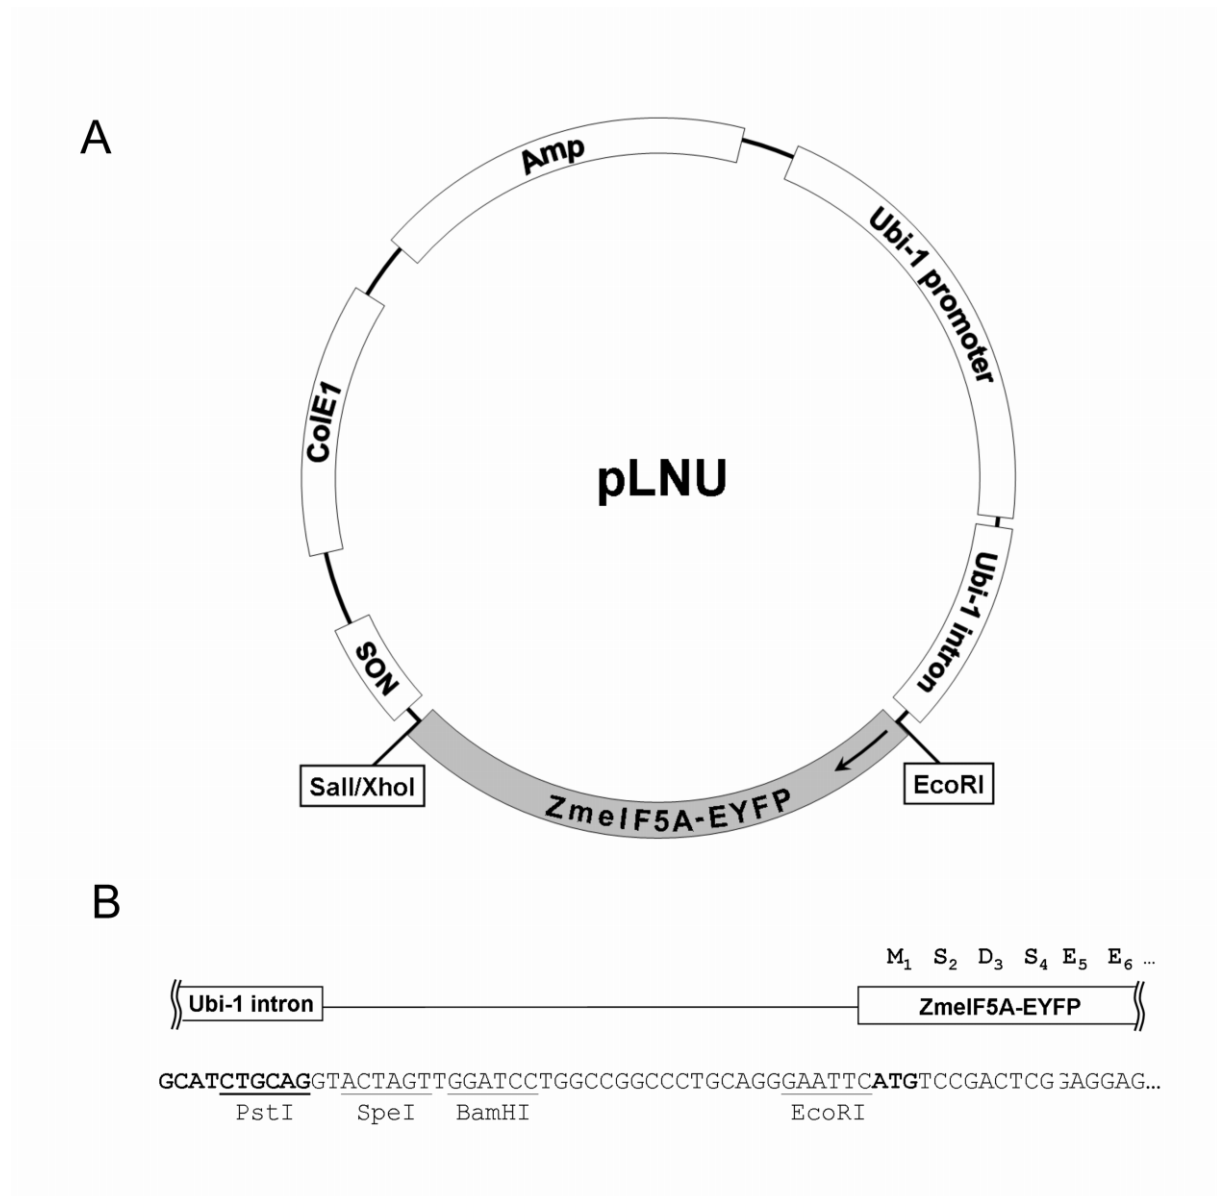

Supplement: supp_M109.018770_jbc.M109.018770-4.pdf [file supp_M109.018770_jbc.M109.018770-4.pdf]
